# Supplementary material for: Impact of speciation on the electron charge transfer properties of nanodiamond drug carriers
Source: Royal Society of Chemistry journal article supplement (doi:10.1039/c6nr03068h), 2016-01-01
Supplement: c6nr03068h1.pdf [file c6nr03068h1.pdf]

# **ELECTRONIC SUPPLEMENTARY INFORMATION**

## **Impact of Speciation on the Electron Charge Transfer Properties of Nanodiamond Drug Carriers**

B. Sun and A. S. Barnard\*

*CSIRO Virtual Nanoscience Laboratory, 343 Royal Parade, Parkville 3052, Victoria,  
Australia*

E-mail: amanda.barnard@csiro.au

---

\*To whom correspondence should be addressed

# Thermodynamically Limited Boltzmann Distribution

Table 1: Boltzmann distribution, for samples that are thermodynamically limited: Shapes, with the probability distributed over all sizes.

|                               | Expectation Values (eV) |       |           |             | Quality Factors (arb.) |      |           |             |
|-------------------------------|-------------------------|-------|-----------|-------------|------------------------|------|-----------|-------------|
|                               | IP                      | EA    | $E_{gap}$ | $E_{Fermi}$ | IP                     | EA   | $E_{gap}$ | $E_{Fermi}$ |
| Octahedron                    | 5.063                   | 4.153 | 0.910     | -4.611      | 33.0                   | 24.4 | 3.0       | 86.4        |
| Rhombi-truncated Octahedron   | 5.380                   | 4.569 | 0.810     | -4.973      | 28.2                   | 26.5 | 3.0       | 39.6        |
| Truncated Octahedron          | 5.306                   | 4.413 | 0.892     | -4.859      | 47.6                   | 23.0 | 3.9       | 44.9        |
| Doubly-truncated Octahedron   | 5.145                   | 4.337 | 0.808     | -4.755      | 28.5                   | 18.4 | 2.3       | 41.6        |
| Rhombic Dodecahedron          | 5.614                   | 4.823 | 0.791     | -5.215      | 37.8                   | 29.3 | 5.2       | 37.2        |
| Truncated Dodecahedron        | 5.748                   | 4.889 | 0.859     | -5.320      | 33.4                   | 21.7 | 6.1       | 28.1        |
| Small Rhombicuboctahedron     | 5.458                   | 4.497 | 0.961     | -4.975      | 35.0                   | 21.5 | 4.6       | 32.1        |
| Doubly-truncated Dodecahedron | 5.576                   | 4.755 | 0.820     | -5.164      | 37.7                   | 17.0 | 2.9       | 30.4        |
| Cube                          | 6.052                   | 5.060 | 0.991     | -5.558      | 15.1                   | 16.9 | 4.6       | 16.2        |
| Truncated Cube                | 5.674                   | 4.851 | 0.823     | -5.262      | 36.2                   | 31.3 | 3.2       | 58.7        |
| Cuboctahedron                 | 5.488                   | 4.760 | 0.729     | -5.096      | 24.2                   | 16.0 | 4.7       | 31.8        |
| Great Rhombicuboctahedron     | 5.570                   | 4.630 | 0.940     | -5.100      | 144.9                  | 29.9 | 29.2      | 34.1        |
| Mixture (All)                 | 5.442                   | 4.583 | 0.859     | -5.012      | 18.9                   | 14.6 | 3.3       | 18.9        |

Table 2: Boltzmann distribution, for samples that are thermodynamically limited: Facet-constrained samples, with the probability distributed over all sizes.

|                 | Expectation Values (eV) |       |           |             | Quality Factors (arb.) |      |           |             |
|-----------------|-------------------------|-------|-----------|-------------|------------------------|------|-----------|-------------|
|                 | IP                      | EA    | $E_{gap}$ | $E_{Fermi}$ | IP                     | EA   | $E_{gap}$ | $E_{Fermi}$ |
| (111)-enriched  | 5.230                   | 4.379 | 0.852     | -4.809      | 25.9                   | 18.1 | 2.9       | 29.2        |
| (110)-enriched  | 5.582                   | 4.710 | 0.873     | -5.144      | 29.3                   | 17.1 | 4.0       | 24.2        |
| (100)-enriched  | 5.623                   | 4.772 | 0.851     | -5.188      | 22.1                   | 17.8 | 3.7       | 22.1        |
| Quasi-spherical | 5.449                   | 4.582 | 0.866     | -5.018      | 21.0                   | 16.4 | 3.2       | 21.7        |
| Highly faceted  | 5.433                   | 4.585 | 0.848     | -5.004      | 16.8                   | 12.8 | 3.5       | 16.3        |

Table 3: Boltzmann distribution, for samples that are thermodynamically limited: Speciation-constrained samples, with the probability distributed over all sizes.

|                             | Expectation Values (eV) |       |           |             | Quality Factors (arb.) |      |           |             |
|-----------------------------|-------------------------|-------|-----------|-------------|------------------------|------|-----------|-------------|
|                             | IP                      | EA    | $E_{gap}$ | $E_{Fermi}$ | IP                     | EA   | $E_{gap}$ | $E_{Fermi}$ |
| sp <sup>3</sup> -enriched   | 5.563                   | 4.727 | 0.837     | -5.148      | 24.1                   | 18.4 | 4.6       | 23.1        |
| sp <sup>2</sup> -enriched   | 5.265                   | 4.374 | 0.891     | -4.822      | 24.7                   | 19.8 | 3.0       | 30.4        |
| sp <sup>2+x</sup> -enriched | 5.515                   | 4.663 | 0.852     | -5.082      | 18.5                   | 14.8 | 2.7       | 20.3        |
| $N_{coord} < 3.5$           | 5.221                   | 4.253 | 0.967     | -4.737      | 22.0                   | 19.7 | 3.3       | 27.8        |
| $N_{coord} > 3.5$           | 5.509                   | 4.683 | 0.826     | -5.095      | 20.5                   | 17.4 | 3.5       | 22.0        |

# Size-dependent Normal Distribution

Table 4: Normal distribution, for samples that are kinetically limited: Shapes, with the probability distributed over all sizes.

|                               | Expectation Values (eV) |       |           |             | Quality Factors (arb.) |      |           |             |
|-------------------------------|-------------------------|-------|-----------|-------------|------------------------|------|-----------|-------------|
|                               | IP                      | EA    | $E_{gap}$ | $E_{Fermi}$ | IP                     | EA   | $E_{gap}$ | $E_{Fermi}$ |
| Octahedron                    | 5.030                   | 4.144 | 0.886     | -4.589      | 32.1                   | 27.4 | 3.0       | 101.9       |
| Rhombi-truncated Octahedron   | 5.379                   | 4.573 | 0.805     | -4.977      | 26.1                   | 23.3 | 2.8       | 34.8        |
| Truncated Octahedron          | 5.311                   | 4.350 | 0.961     | -4.830      | 40.4                   | 31.0 | 5.2       | 48.4        |
| Doubly-truncated Octahedron   | 5.121                   | 4.394 | 0.727     | -4.761      | 25.3                   | 20.7 | 2.0       | 45.7        |
| Rhombic Dodecahedron          | 5.590                   | 4.801 | 0.789     | -5.190      | 34.5                   | 25.5 | 4.8       | 32.9        |
| Truncated Dodecahedron        | 5.755                   | 4.870 | 0.884     | -5.315      | 34.3                   | 21.2 | 5.6       | 28.2        |
| Small Rhombicuboctahedron     | 5.496                   | 4.495 | 1.001     | -4.994      | 35.1                   | 20.4 | 5.2       | 29.9        |
| Doubly-truncated Dodecahedron | 5.583                   | 4.773 | 0.811     | -5.176      | 41.4                   | 13.9 | 2.3       | 27.0        |
| Cube                          | 6.104                   | 5.114 | 0.990     | -5.611      | 15.7                   | 16.4 | 4.7       | 16.5        |
| Truncated Cube                | 5.681                   | 4.849 | 0.832     | -5.265      | 34.1                   | 29.9 | 3.1       | 54.8        |
| Cuboctahedron                 | 5.430                   | 4.716 | 0.714     | -5.042      | 23.7                   | 15.6 | 4.1       | 35.1        |
| Great Rhombicuboctahedron     | 5.571                   | 4.623 | 0.948     | -5.096      | 178.6                  | 30.8 | 33.2      | 34.6        |
| Mixture (All)                 | 5.464                   | 4.601 | 0.863     | -5.030      | 17.4                   | 14.4 | 3.2       | 17.9        |

Table 5: Normal distribution, for samples that are kinetically limited: Facet-constrained, with the probability distributed over all sizes.

|                 | Expectation Values (eV) |       |           |             | Quality Factors (arb.) |      |           |             |
|-----------------|-------------------------|-------|-----------|-------------|------------------------|------|-----------|-------------|
|                 | IP                      | EA    | $E_{gap}$ | $E_{Fermi}$ | IP                     | EA   | $E_{gap}$ | $E_{Fermi}$ |
| (111)-enriched  | 5.225                   | 4.388 | 0.837     | -4.808      | 23.4                   | 19.3 | 2.8       | 28.5        |
| (110)-enriched  | 5.595                   | 4.708 | 0.887     | -5.150      | 30.4                   | 16.2 | 3.8       | 23.9        |
| (100)-enriched  | 5.644                   | 4.776 | 0.868     | -5.203      | 20.1                   | 17.2 | 3.6       | 20.1        |
| Quasi-spherical | 5.457                   | 4.594 | 0.863     | -5.026      | 20.1                   | 17.0 | 3.0       | 21.8        |
| Highly faceted  | 5.472                   | 4.609 | 0.863     | -5.035      | 15.1                   | 12.3 | 3.6       | 14.9        |

Table 6: Normal distribution, for samples that are kinetically limited: Speciation-constrained, with the probability distributed over all sizes.

|                             | Expectation Values (eV) |       |           |             | Quality Factors (arb.) |      |           |             |
|-----------------------------|-------------------------|-------|-----------|-------------|------------------------|------|-----------|-------------|
|                             | IP                      | EA    | $E_{gap}$ | $E_{Fermi}$ | IP                     | EA   | $E_{gap}$ | $E_{Fermi}$ |
| sp <sup>3</sup> -enriched   | 5.589                   | 4.726 | 0.863     | -5.159      | 25.9                   | 18.7 | 5.0       | 23.8        |
| sp <sup>2</sup> -enriched   | 5.251                   | 4.387 | 0.863     | -4.820      | 26.0                   | 25.7 | 3.5       | 34.5        |
| sp <sup>2+x</sup> -enriched | 5.556                   | 4.727 | 0.830     | -5.140      | 20.3                   | 19.0 | 3.0       | 23.5        |
| $N_{coord} < 3.5$           | 5.205                   | 4.272 | 0.934     | -4.738      | 21.8                   | 21.9 | 3.3       | 29.0        |
| $N_{coord} > 3.5$           | 5.537                   | 4.693 | 0.843     | -5.113      | 18.8                   | 16.5 | 3.2       | 20.3        |

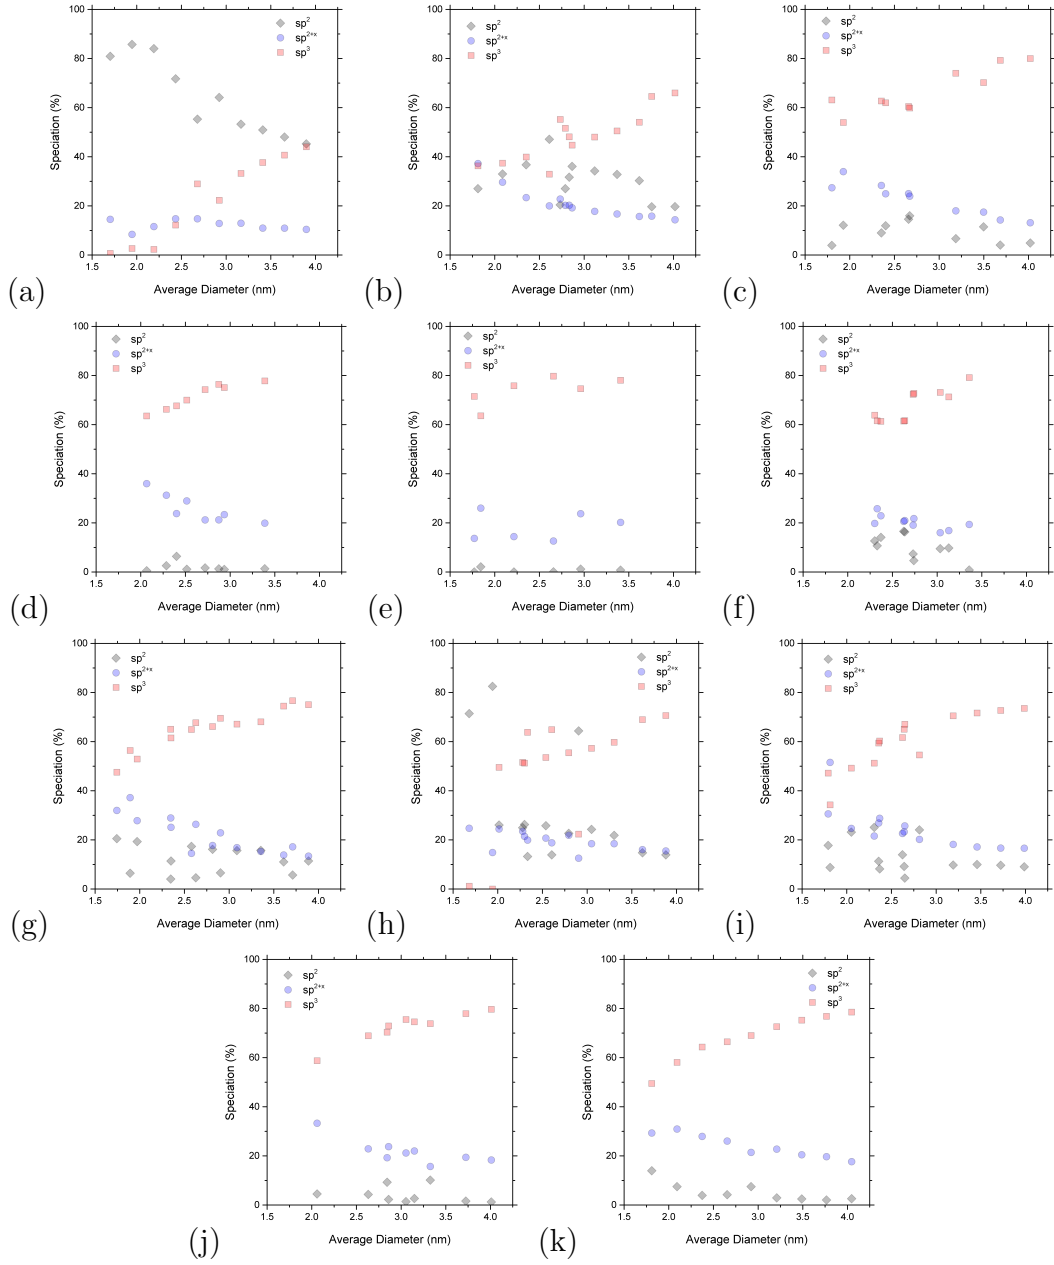

Figure 1: Size-dependent speciation for each of the shapes represented in the dataset used in this study: (a) the octahedron, (b) truncated octahedron, (c) cuboctahedron, (d) truncated cube, (e) cube, (f) great rhombicuboctahedron, (g) small rhombicuboctahedron, (h) doubly-truncated octahedron, (i) rhombi-truncated octahedron, (j) truncated dodecahedron and (k) the rhombic dodecahedron.

# Bond Length Distributions

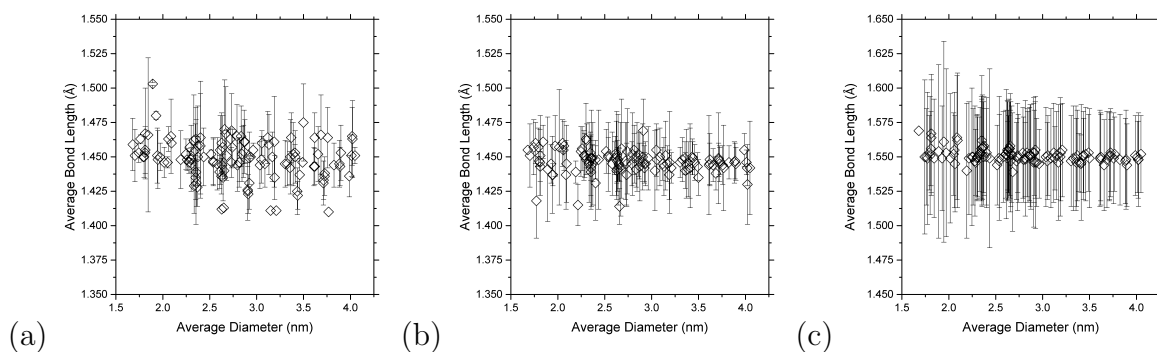

Figure 2: Bond lengths, with error bar representing the bond length distribution, for each bucky-diamond structure represented in this dataset, separated according to the speciation: (a)  $sp^2$  hybridized atoms, (b)  $sp^{2+x}$  hybridized atoms, and (c)  $sp^3$  hybridized atoms.

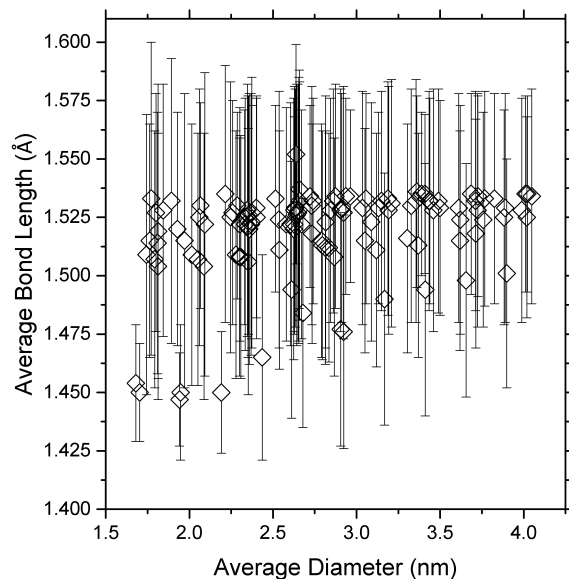

Figure 3: The average bond length, with error bar representing the bond length distribution, for each of the bucky-diamond structure represented in this dataset, averaging over all bond types.

# Bond Angle Distributions

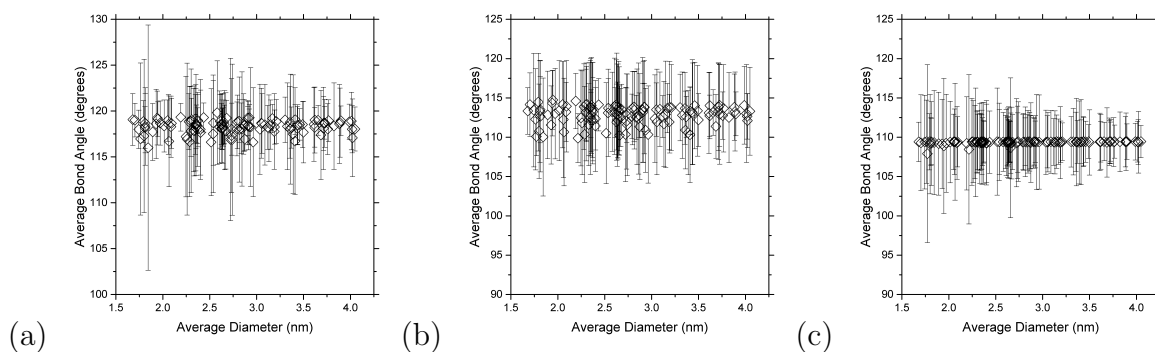

Figure 4: Bond angles, with error bar representing the bond length distribution, for each bucky-diamond structure represented in this dataset, separated according to the speciation: (a)  $sp^2$  hybridized atoms, (b)  $sp^{2+x}$  hybridized atoms, and (c)  $sp^3$  hybridized atoms.

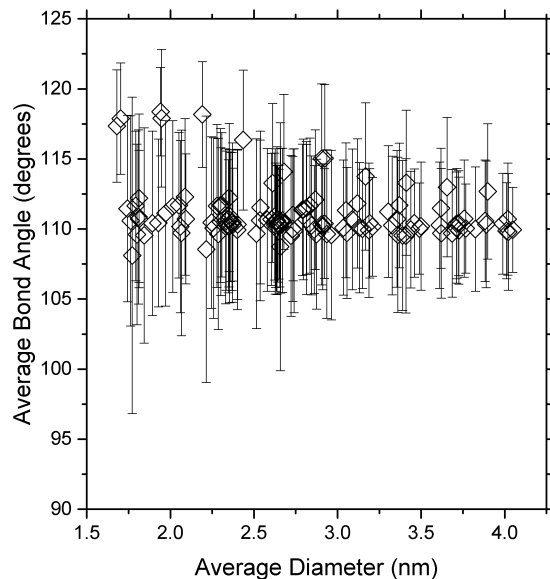

Figure 5: The average bond angle, with error bar representing the bond length distribution, for each of the bucky-diamond structure represented in this dataset, averaging over all bond types.

## Acknowledgement

Computational resources for this project were supplied by the National Computational Infrastructure national facility under Partner Allocation Scheme, Grant q27.
